# Supplementary material for: Different physicochemical behaviors of nitrate and ammonium during transport: a case study on Mt. Hua, China
Source: Copernicus journal article supplement (doi:10.5194/acp-22-15621-2022), 2022-12-13
Supplement: Supplementary file 1 [file acp-22-15621-2022-supplement.pdf]

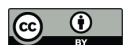

*Supplement of*

## **Different physicochemical behaviors of nitrate and ammonium during transport: a case study on Mt. Hua, China**

**Can Wu et al.**

*Correspondence to:* Gehui Wang (ghwang@geo.ecnu.edu.cn)

The copyright of individual parts of the supplement might differ from the article licence.

Supporting Information

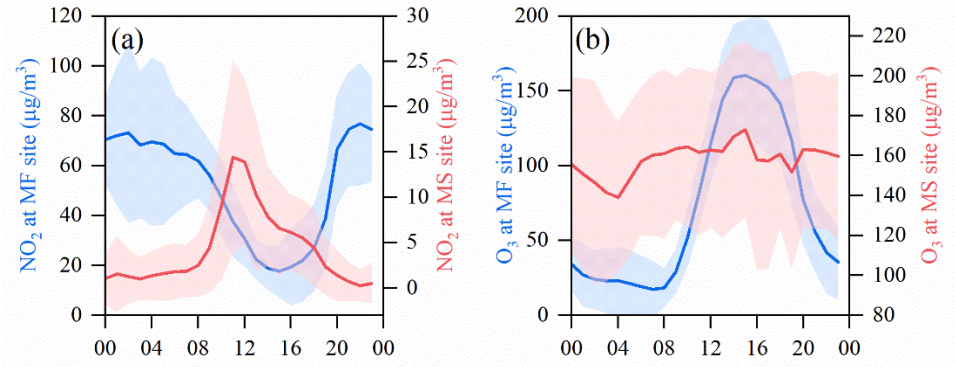

Figure S1 Diurnal variation of NO<sub>2</sub> and O<sub>3</sub> at mountain food (MF) and mountainside (MS) sites.

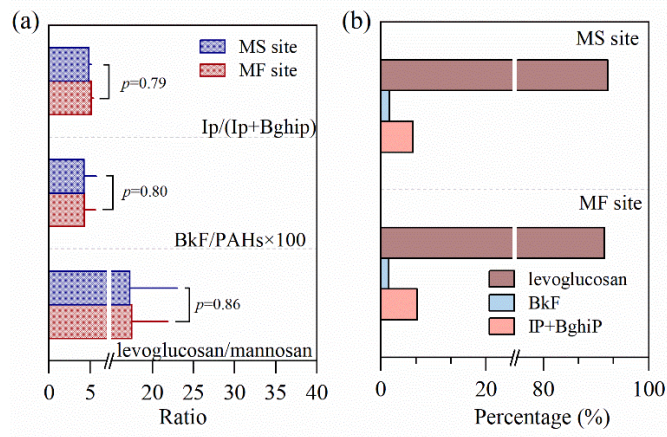

Figure S2 The mass ratio and proportion of organic tracers at two sampling sites.

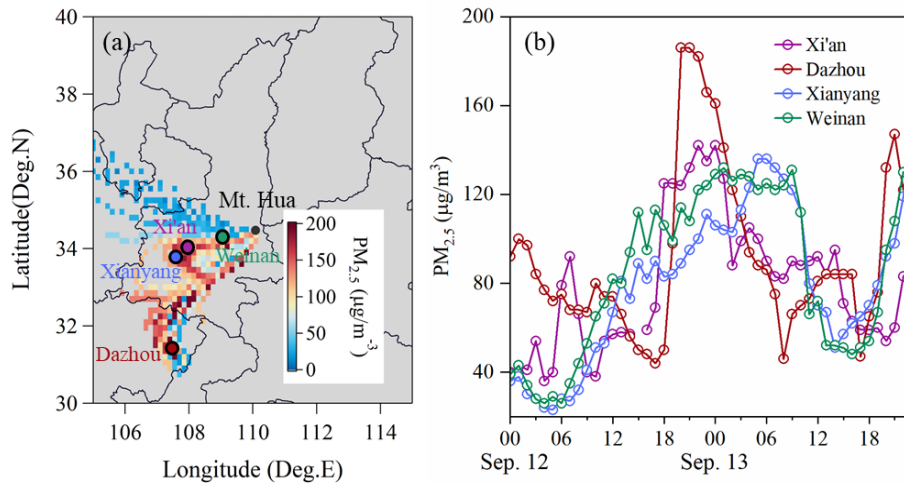

Figure S3 Concentration-weighted trajectory (CWT) analyses of PM<sub>2.5</sub> during 12-13 Sep. (a). Right panel shows the time series of hourly PM<sub>2.5</sub> concentrations at different cities on the pollutions transport pathways (b). (The data of hourly PM<sub>2.5</sub> concentration was downloaded from <https://www.zq12369.com/>).

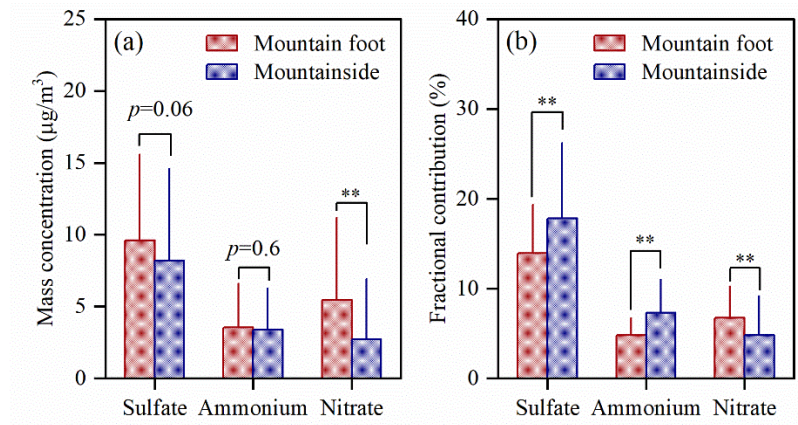

Figure S4 The mass concentration and fractional contributions to PM<sub>2.5</sub> of SNA excluding the data during 12-13 September at two sites.

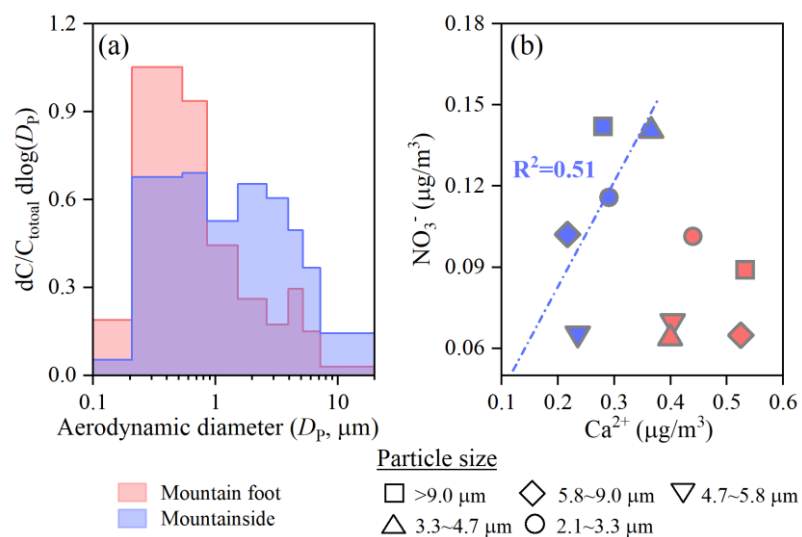

Figure S5 (a) Size distributions of  $\text{NO}_3^-$  at two sampling sites, (b) Linear fit regressions for  $\text{NO}_3^-$  and  $\text{Ca}^{2+}$  in the coarse mode.

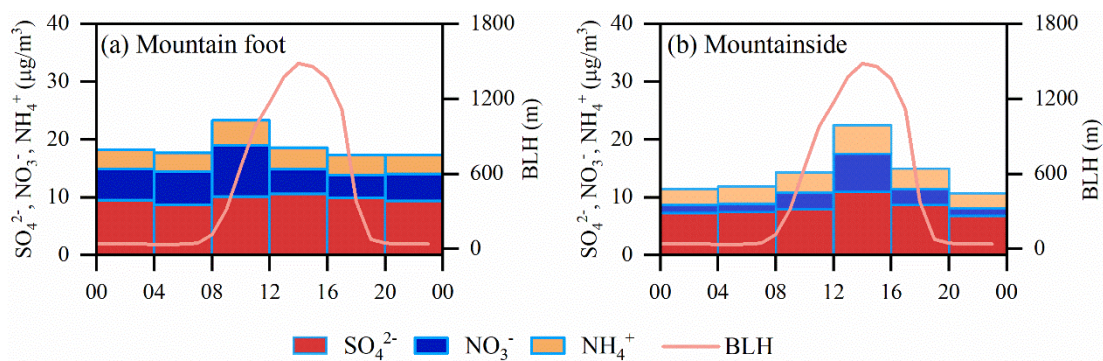

Figure S6 Diurnal variation of sulfate, nitrate and ammonium at mountain foot (MF) and mountainside (MS) sites.
